# Supplementary material
Source: PubMed Central journal article supplement (PMC4094003)
Supplement: supp_113.116186_biolreprod.113.116186-1.pdf [file supp_113.116186_biolreprod.113.116186-1.pdf]

Aye et al., Supplemental Table S1

**Supplemental Table 1. Clinical characteristics of the study population stratified by sample analysis**

| Placental Samples                 | Normal                  | Overweight              | Obese                   | Range       |
|-----------------------------------|-------------------------|-------------------------|-------------------------|-------------|
|                                   | BMI < 25                | BMI 25–30               | BMI > 30                | All BMI     |
| N                                 | 13                      | 10                      | 9                       | 32          |
| BMI (kg/m <sup>2</sup> )          | 22.9 ± 0.4 <sup>a</sup> | 27.7 ± 0.4 <sup>a</sup> | 33.1 ± 1.0 <sup>a</sup> | 20 – 38.9   |
| Weight gain (kg)                  | 15.3 ± 1.0 <sup>a</sup> | 13.8 ± 1.6 <sup>a</sup> | 12.6 ± 1.6 <sup>a</sup> | 3.8 – 21.8  |
| Maternal age (yrs)                | 28.1 ± 1.6 <sup>a</sup> | 28.1 ± 1.7 <sup>a</sup> | 27.4 ± 1.7 <sup>a</sup> | 19 – 41     |
| Gestational age (wks)             | 39.0 ± 0.3 <sup>a</sup> | 38.7 ± 0.3 <sup>a</sup> | 39.2 ± 0.2 <sup>a</sup> | 37 – 41     |
| Gravidity                         | 2.8 ± 0.2 <sup>a</sup>  | 3.9 ± 0.6 <sup>a</sup>  | 3.4 ± 0.5 <sup>a</sup>  | 2 – 7       |
| Parity                            | 1.3 ± 0.1 <sup>a</sup>  | 1.5 ± 0.2 <sup>a</sup>  | 1.7 ± 0.2 <sup>a</sup>  | 0 – 5       |
| Placental weight (g)              | 699 ± 23 <sup>a</sup>   | 720 ± 32 <sup>a</sup>   | 733 ± 51 <sup>a</sup>   | 448 – 1037  |
| Birth weight (g)                  | 3238 ± 50 <sup>a</sup>  | 3329 ± 93 <sup>ab</sup> | 3457 ± 50 <sup>b</sup>  | 2787 – 3907 |
| Fetal Sex (M/F)                   | 11/2                    | 3/7                     | 4/5                     |             |
| Ethnicity (Hispanic/Non-Hispanic) | 9/4                     | 8/2                     | 6/3                     |             |

| Maternal/Fetal Plasma             | Normal                  | Overweight              | Obese                   | Range       |
|-----------------------------------|-------------------------|-------------------------|-------------------------|-------------|
|                                   | BMI < 25                | BMI 25–30               | BMI > 30                | All BMI     |
| N                                 | 16                      | 11                      | 22                      | 49          |
| BMI (kg/m <sup>2</sup> )          | 22.1 ± 0.4 <sup>a</sup> | 27.5 ± 0.4 <sup>b</sup> | 34.8 ± 1.3 <sup>c</sup> | 19.5 – 54.3 |
| Weight gain (kg)                  | 13.6 ± 1.1 <sup>a</sup> | 13.2 ± 1.2 <sup>a</sup> | 7.4 ± 1.3 <sup>b</sup>  | -5.5 – 23.8 |
| Maternal age (yrs)                | 29.1 ± 1.9 <sup>a</sup> | 28.6 ± 2.0 <sup>a</sup> | 26.7 ± 1.1 <sup>a</sup> | 18 – 44     |
| Gestational age (wks)             | 39.1 ± 0.3 <sup>a</sup> | 38.9 ± 0.2 <sup>a</sup> | 39.2 ± 0.2 <sup>a</sup> | 37 – 41     |
| Gravidity                         | 2.9 ± 0.2 <sup>a</sup>  | 3.5 ± 0.5 <sup>a</sup>  | 3.5 ± 0.3 <sup>a</sup>  | 2 – 7       |
| Parity                            | 1.5 ± 0.2 <sup>a</sup>  | 1.6 ± 0.2 <sup>a</sup>  | 1.9 ± 0.2 <sup>a</sup>  | 0 – 5       |
| Placental weight (g)              | 668 ± 31 <sup>a</sup>   | 738 ± 33 <sup>a</sup>   | 717 ± 30 <sup>a</sup>   | 448 – 1049  |
| Birth weight (g)                  | 3251 ± 62 <sup>a</sup>  | 3327 ± 111 <sup>a</sup> | 3466 ± 58 <sup>a</sup>  | 2787 – 3923 |
| Fetal Sex (M/F)                   | 8/8                     | 3/8                     | 9/13                    |             |
| Ethnicity (Hispanic/Non-Hispanic) | 9/7                     | 9/2                     | 18/4                    |             |

Table represents the demographics of the study cohort stratified by placental samples or maternal/fetal plasma. There was a total of 21 overlapping samples between the two sample sets.
